# Supplementary material for: Recommendations for somatic and germline genetic testing of single pheochromocytoma and paraganglioma based on findings from a series of 329 patients
Source: HighWire-hosted journal article supplement (doi:10.1136/jmedgenet-2015-103218), 2015-08-12

Supplementary Figures:

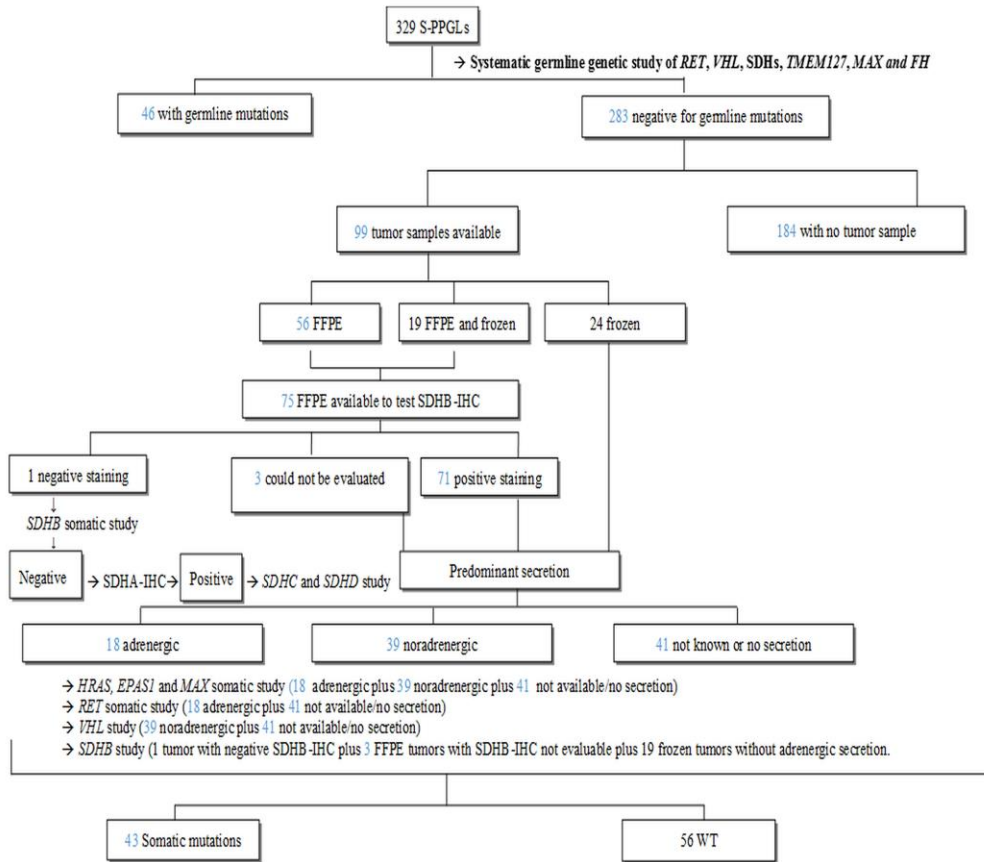

Figure S1. Details summarizing the steps of the genetic workflow study.

Figure 2:

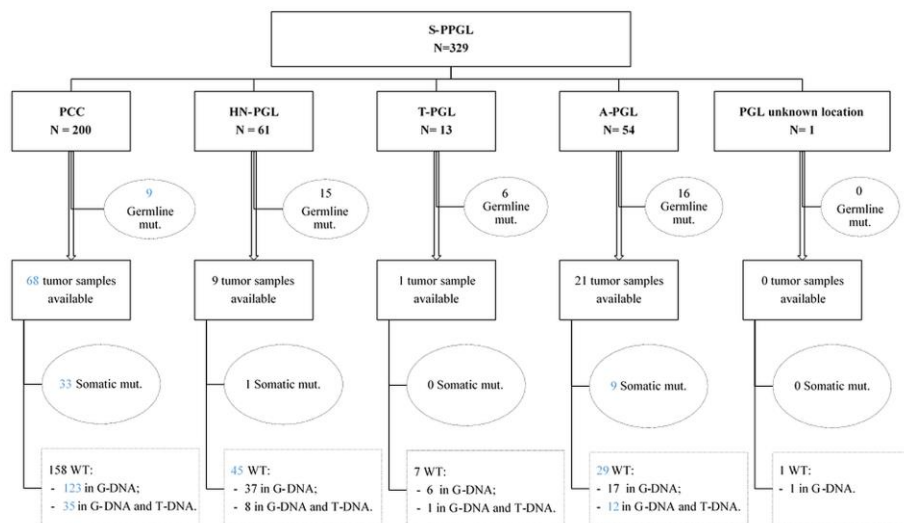

Supplement: jmedgenet-2015-103218supp_figures.pdf [file jmedgenet-2015-103218supp_figures.pdf]
